# Supplementary material
Source: PubMed Central journal article supplement (PMC3485964)
Supplement: AEM.01693-12_zam999103837so1.pdf [file AEM.01693-12_zam999103837so1.pdf]

1 **Supplementary information**

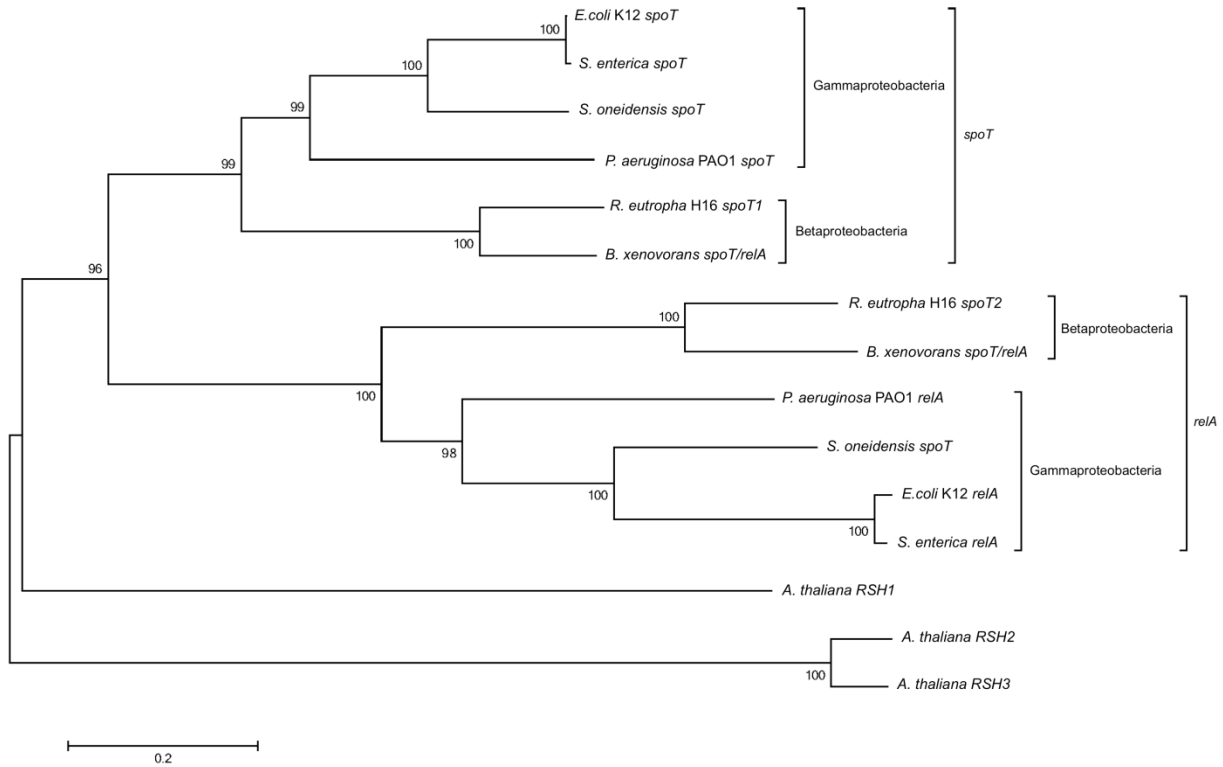

2  
 3 **Supplemental figure S1. Phylogeny of *R. eutropha* *spoT1* and *spoT2*.** Like most  $\beta$ - and  $\gamma$ -  
 4 proteobacteria, the genome of *R. eutropha* contains two *relA-spoT* homologue genes. One of  
 5 these (*spoT2*, locus tag H16\_A1337) clusters with the genes characterized as *relA*, the other  
 6 (*spoT1*, locus tag H16\_A0955) clusters with the genes characterized as *spoT*. Sequences used for  
 7 comparison belong to *Escherichia coli* K12 (NC\_000913), *Salmonella enterica* (NC\_010102),  
 8 *Schewanella oneidensis* (NC\_004347), *Pseudomonas aeruginosa* PAO1 (NC\_002516),  
 9 *Ralstonia eutropha* H16 (NC\_008313), *Burkholderia xenovorans* (NC\_007951) and *Arabidopsis*  
 10 *thaliana* (NC\_003070; NC\_003074; NC\_003075)

11

12

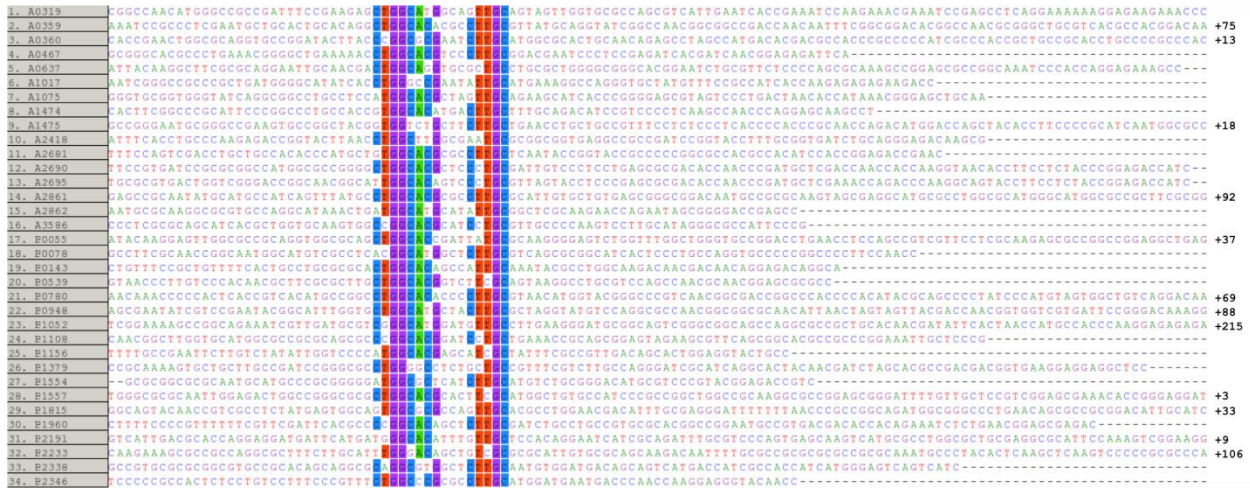

13

14

15

16

17

18

19

20

21

22

23

**Supplemental figure S2. Alignment of promoter regions of the most strongly upregulated genes under nitrogen stress.** The 34 sequences shown are potential promoters for 76 out of 96 genes that are upregulated over 50-fold during nitrogen stress. Highlighted nucleotides indicate the -12 and -24 boxes, are conserved in 50% or more of the shown sequences and were identified using the weighted consensus sequence (-28) YTGGCACGNNNNTTGCW (-10) for  $\sigma^{54}$  promoters (1). Sequences are truncated at the predicted start codon. The number behind the sequences indicates the distance to the start codon. Nucleotides are color coded (adenine - green; thymine – red; cytosine – blue; guanine – purple).

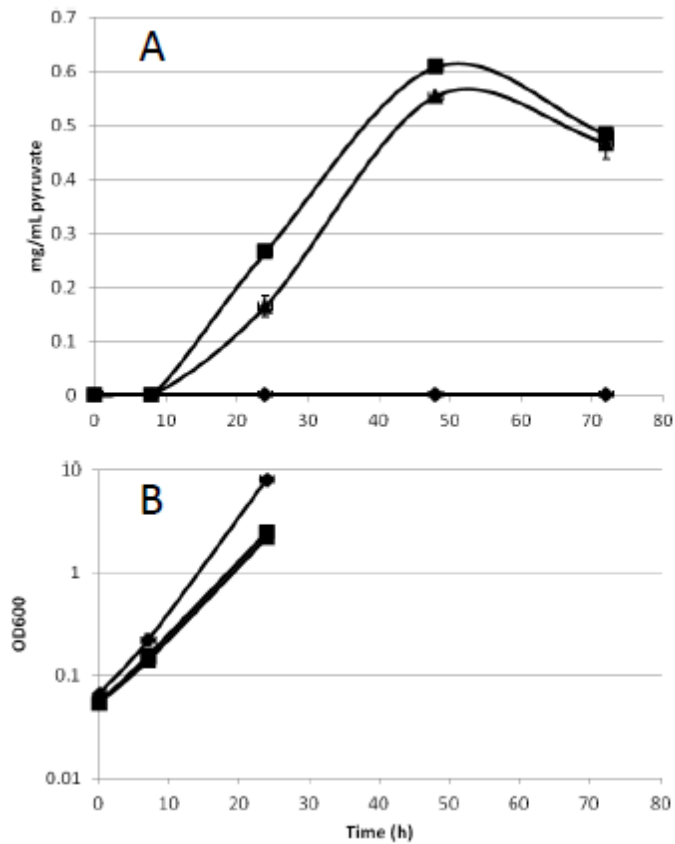

24

25 **Supplemental Figure S3. Secretion of pyruvate into the growth medium by *R. eutropha***  
 26 **strains that do not synthesize PHB.** *R. eutropha* H16 (wild type, diamonds), Re2411 ( $\Delta spoT2$ ,  
 27 boxes), and Re2061 ( $\Delta phaCAB$ , triangles) were incubated in minimal medium containing 0.1 %  
 28 (w/v)  $NH_4Cl$ , 2 % (w/v) sodium gluconate, and supplemented with 10 g/mL gentamicin.  
 29 Throughout the course of the experiment, culture supernatants were analyzed by HPLC for the  
 30 presence of pyruvate (A). Pyruvate concentrations present in the culture supernatant were  
 31 determined by comparison with a standard curve. Over the first 24 h, cell growth (OD<sub>600</sub> values)  
 32 of the cultures was analyzed (B). Strain Re2061 was constructed using previously described  
 33 methods (2) using primers listed in Supplemental Table 1. Cultures were performed in triplicate.

34

35

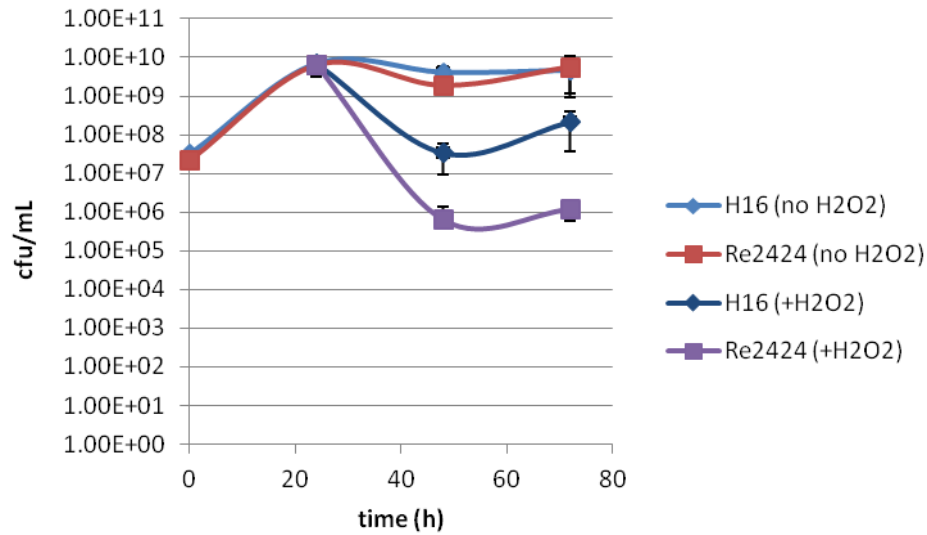

36

37 **Supplemental Figure S4. Hydrogen peroxide challenge of *R. eutropha* H16 (WT, diamonds)**  
38 **and Re2424 ( $\Delta rpoS$ , boxes).** Cells were incubated in TSB medium supplemented with 10  $\mu\text{g/mL}$   
39 gentamicin. At 24 h, cultures were split and 3 % (v/v, final concentration) of hydrogen peroxide  
40 was added to half of the cultures and buffer was added to the other half. Every 24 h, 1 mL  
41 aliquots of culture were serially diluted in 0.85% (w/v) NaCl and plated on TSB agar plates  
42 supplemented with 10  $\mu\text{g/mL}$  gentamicin to quantify viable colony forming units per mL culture  
43 (cfu/mL).

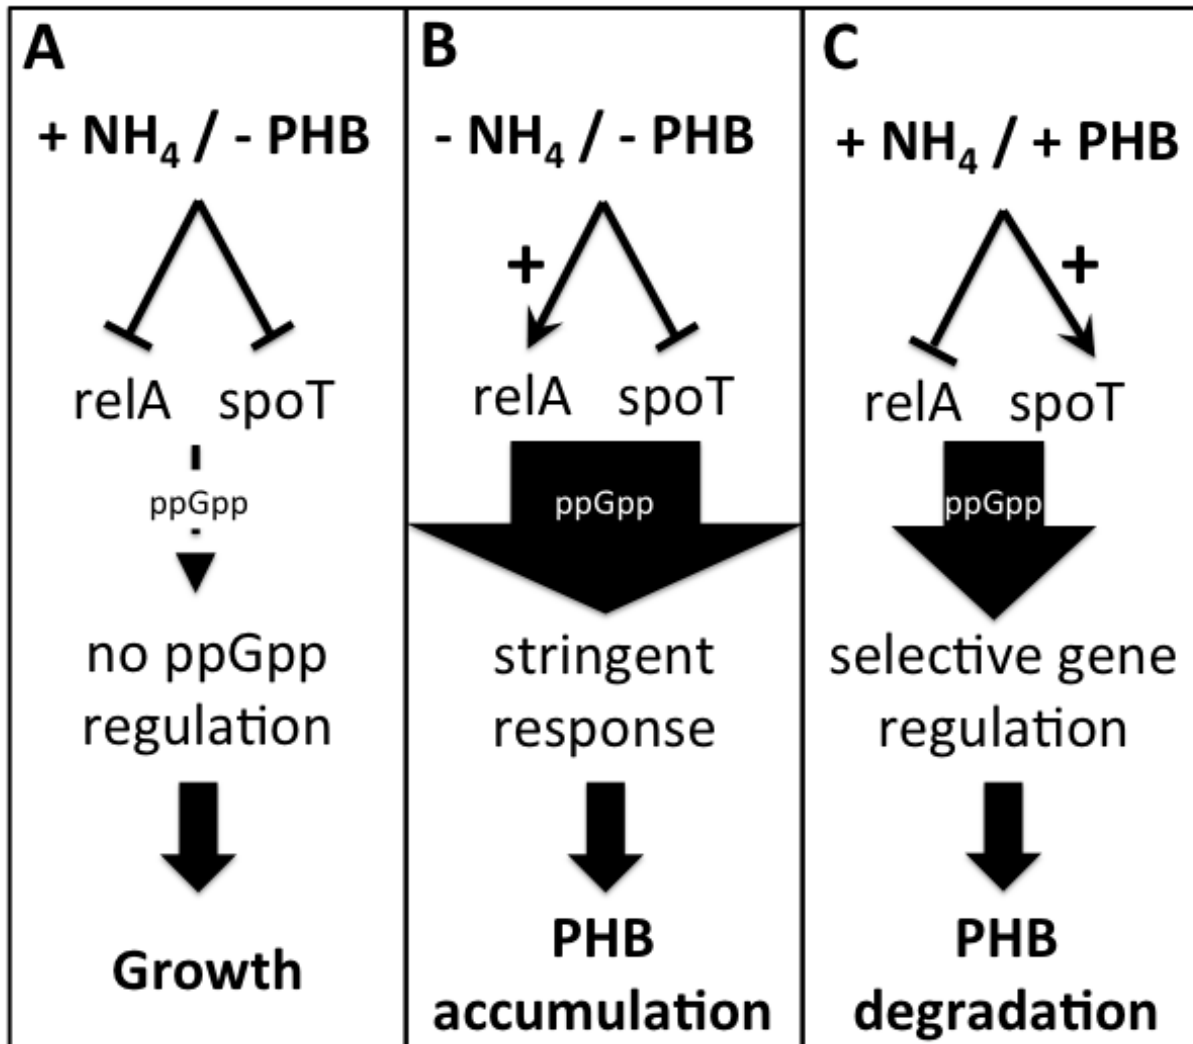

44  
 45  
 46 **Supplemental Figure S5. A schematic potential overview of proposed ppGpp regulation of**  
 47 **the PHB cycle.** (A) In the presence of a nitrogen source, ppGpp synthase activities of both RelA  
 48 and SpoT are inhibited, no ppGpp-dependent gene regulation occurs and normal growth  
 49 progresses. (B) Depletion of the nitrogen source causes amino acid shortage, thus activating  
 50 RelA-dependent ppGpp synthase activity and initiating the stringent response and PHB  
 51 accumulation. (C) Renewed availability of the nitrogen source in the presence of intracellular  
 52 PHB initiates SpoT-dependent ppGpp synthase activity, leading to a lower intracellular ppGpp  
 53 concentration and the observed selective gene regulation. Thickness of ppGpp arrow represents  
 54 putative intracellular ppGpp concentrations.

55

56

57 **Supplemental Table 1. List of primers used in this work.**

|                           |                                                     |
|---------------------------|-----------------------------------------------------|
| DS spoT2-del BamHI 1 (Fw) | 5' - TATAGGAT <u>CCC</u> ATGCCCCGACCTTTGTC - 3'     |
| DS spoT2-del XhoI 2 (Rv)  | 5' - ATTACTCGAGCATGTCACAACGCCTGCATC - 3'            |
| DS spoT2-del XhoI 3 (Fw)  | 5' - TGTTCTCGAGTGATGCTATACTTGCGGCTTCG - 3'          |
| DS spoT2-del XbaI 4 (Rv)  | 5' - T <u>TA</u> CTCTAGAGGCAGCGTGATTGCGAT - 3'      |
| DS spoT2-del test (Fw)    | 5' - GTCGATCCCAAGGCCGATA - 3'                       |
| DS spoT2-del test (Rv)    | 5' - CAGCGGTAGTAGTTCGCGG - 3'                       |
| DS rpoS-del BamHI 1       | 5' - TTATGGATCCTCACCGATGGCTCGATGAAG - 3'            |
| DS rpoS-del XhoI 2 (Rv)   | 5' - TTATCTCGAGCATGAACCCTCACTGTGGCG - 3'            |
| DS rpoS-del XhoI 3 (Fw)   | 5' - TTATCTCGAGAGGAAGGACGCTGTTCTATGACC - 3'         |
| DS rpoS-del XbaI 4 (Rv)   | 5' - GAAT <u>TCT</u> AGAATCGCCAGCAGGTCCATCA - 3'    |
| DS rpoS-del test Rv       | 5' - CTGTAGCGCGCGATCAGTTC - 3'                      |
| DS rpoS-del test Fw       | 5' - ATATTGCGGGCAAGAAGGG - 3'                       |
| rpoScompFW                | 5' - GAACGTCGACATGCCACGCCAGAAAA - 3'                |
| rpoScompRV                | 5' - GGTCTCTAGATCATAGAACAGCGTCC - 3'                |
| phaCABdel1                | 5' - ACTAGGATCCAGATGCGAGCGCTGCATAC - 3'             |
| phaCABdel2                | 5' - GCCG <u>T</u> TAATTAAGATTTGATTGTCTCTCTGCC - 3' |
| phaCABdel3                | 5' - CTTG <u>T</u> TAATTAACCTGCCGGCCTGGTTCAACC - 3' |
| phaCABdel4                | 5' - AATTGGATCCGAGCACCGATGGCCACGACC - 3'            |
| phaCABdelchkFW            | 5' - CTATCGGAATGGACGCAAG - 3'                       |
| phaCABdelchkRV            | 5' - GAAACGATTCGCGGGCCTT - 3'                       |

58 Restriction sites underlined

59 **Supplemental Table 2. Gene expression of  $\beta$ -ketothiolase homologs (showing similarity to**  
 60 **PhaA).**

| Locus tag | Growth with fructose and nitrogen | PHB Production | PHB Utilization | P value |
|-----------|-----------------------------------|----------------|-----------------|---------|
| H16_A0170 | 8.2                               | 8.0            | 7.0             | 0.001   |
| H16_A0462 | 5.4                               | 5.6            | 5.0             | 0.246   |
| H16_A1528 | 6.0                               | 7.1            | 5.9             | 0.754   |
| H16_A1713 | 6.6                               | 7.1            | 6.6             | 0.900   |
| H16_A1720 | 2.9                               | 3.1            | 3.3             | 0.146   |
| H16_A1887 | 4.3                               | 4.4            | 4.6             | 0.513   |
| H16_B0200 | 5.3                               | 5.6            | 5.2             | 0.419   |
| H16_B0381 | 2.8                               | 3.0            | 3.0             | 0.0468  |
| H16_B0662 | 4.2                               | 4.3            | 4.7             | 0.0646  |
| H16_B0668 | 2.9                               | 2.8            | 3.2             | 0.28    |
| H16_B0759 | 5.8                               | 7.6            | 4.7             | 0.0687  |
| H16_B1369 | 3.0                               | 3.4            | 3.2             | 0.445   |
| H16_B1771 | 6.6                               | 7.2            | 6.6             | 0.938   |

61

62

63 **Supplemental Table 3. Gene expression of Acetoacetyl-CoA reductase homologs (showing**  
 64 **similarity to PhaB).**

| Gene locus tag | Growth with fructose and nitrogen | PHB production | PHB utilization | P value |
|----------------|-----------------------------------|----------------|-----------------|---------|
| H16_A0743      | 7.8                               | 7.2            | 7.3             | 0.284   |
| H16_A0931      | 6.7                               | 6.2            | 5.8             | 0.00776 |
| H16_A1267      | 3.8                               | 3.9            | 3.8             | 0.892   |
| H16_A1287      | 3.8                               | 4.1            | 3.9             | 0.584   |
| H16_A1325      | 8.8                               | 8.0            | 8.5             | 0.111   |
| H16_A1334      | 8.6                               | 8.2            | 7.1             | 0.00345 |
| H16_A1531      | 4.8                               | 5.5            | 4.9             | 0.617   |
| H16_A1814      | 3.6                               | 3.7            | 3.9             | 0.486   |
| H16_A2152      | 3.7                               | 3.7            | 4.2             | 0.0399  |
| H16_A2567      | 9.2                               | 7.0            | 7.9             | 0.00108 |
| H16_A3164      | 8.0                               | 5.0            | 5.6             | 0.00191 |
| H16_A3487      | 6.9                               | 6.4            | 6.5             | 0.269   |
| H16_B0062      | 7.6                               | 7.5            | 6.9             | 0.00826 |
| H16_B0101      | 5.2                               | 5.1            | 5.1             | 0.48    |
| H16_B0201      | 5.0                               | 5.1            | 5.8             | 0.0311  |
| H16_B0361      | 3.6                               | 3.9            | 3.8             | 0.322   |
| H16_B0385      | 4.0                               | 3.8            | 4.3             | 0.147   |
| H16_B0394      | 2.7                               | 2.7            | 3.0             | 0.223   |
| H16_B0601      | 5.1                               | 4.8            | 4.8             | 0.0361  |
| H16_B0651      | 3.2                               | 3.1            | 3.4             | 0.353   |
| H16_B0663      | 3.8                               | 3.8            | 3.9             | 0.103   |
| H16_B0666      | 2.9                               | 3.0            | 3.0             | 0.093   |
| H16_B0687      | 4.6                               | 5.7            | 4.4             | 0.224   |
| H16_B0713      | 4.9                               | 7.6            | 5.4             | 0.00489 |
| H16_B1075      | 3.0                               | 3.2            | 3.3             | 0.0228  |
| H16_B1240      | 7.0                               | 6.1            | 5.9             | 0.0223  |
| H16_B1297      | 3.8                               | 4.9            | 4.8             | 0.111   |
| H16_B1334      | 4.1                               | 4.1            | 4.5             | 0.153   |
| H16_B1442      | 2.9                               | 3.2            | 2.9             | 0.907   |
| H16_B1696      | 3.6                               | 3.9            | 3.9             | 0.395   |
| H16_B1834      | 4.1                               | 5.1            | 4.0             | 0.412   |
| H16_B1904      | 4.3                               | 4.7            | 5.0             | 0.0181  |
| H16_B2339      | 2.8                               | 6.1            | 3.1             | 0.029   |
| H16_B2510      | 5.9                               | 5.5            | 6.2             | 0.0238  |

65

66



67 **References:**

- 68 1. **Barrios, H., B. Valderrama, and E. Morett.** 1999. Compilation and analysis of  
69 sigma(54)-dependent promoter sequences. *Nucleic Acids Res* **27**:4305-13.
- 70 2. **Brigham, C. J., C. F. Budde, J. W. Holder, Q. Zeng, A. E. Mahan, C. Rha, and A. J.**  
71 **Sinskey.** 2010. Elucidation of beta-oxidation pathways in *Ralstonia eutropha* H16 by  
72 examination of global gene expression. *J Bacteriol* **192**:5454-64.

73

74
